# Supplementary material
Source: PubMed Central journal article supplement (PMC3172804)
Supplement: supp_blood-2011-02-335208_Document1.pdf [file supp_blood-2011-02-335208_Document1.pdf]

Figure S1

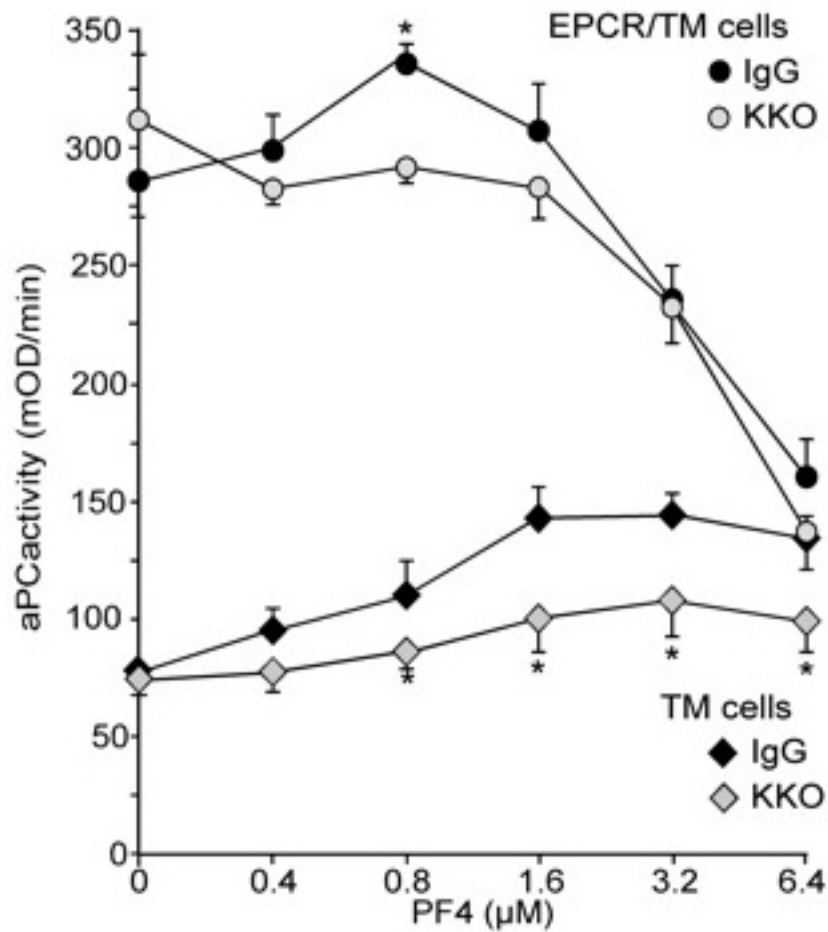

aPC generation studies using K293 cells expressing TM and low (“TM cells”) or high (“EPCR/TM”) EPCR levels (EPCR:TM ratio 0.4:1 and 8.4:1, respectively). Cells were incubated with increased concentration of PF4 in the presence of control IgG or KKO (200 µg/ml), followed by addition with of PC (500 nM) and 2 nM IIa. Results represent the mean ± 1 SD of 3 experiments each in duplicate. \*p<0.05 as compared to control IgG.

Figure S2

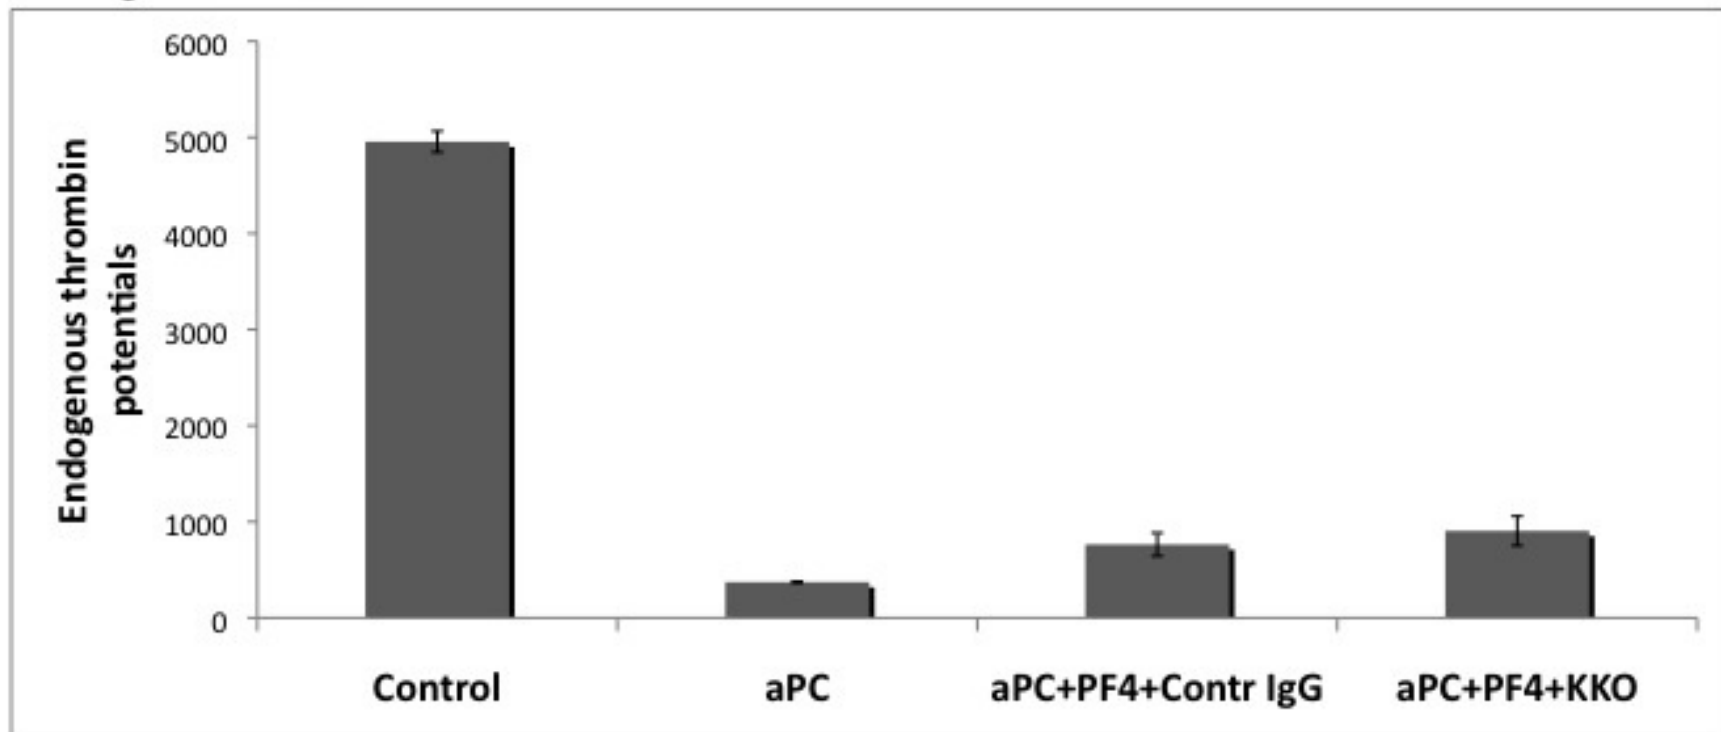

Thrombin generation measured as endogenous thrombin potentials was measured using human plasma in the presence of tissue factor as described earlier (Preston et al. J. Biol. Chem. 2009). Thrombin generation was initiated by addition of fluorogenic thrombin substrate in the absence (control) or presence of aPC (20 nM) as indicated. 1.6  $\mu$ M PF4 was added in the presence of either control isotype IgG (400  $\mu$ g/ml) or HIT-like antibody KKO (400  $\mu$ g/ml). Both PF4 and antibody were at optimal concentrations for optimal aPC generation in our manuscript.
